# Supplementary material for: Purification of plant-derived anti-virus mAb through optimized pH conditions for coupling between protein A and epoxy-activated beads
Source: PeerJ. 2019 May 21;7:e6828. doi: 10.7717/peerj.6828 (PMC6534112; doi:10.7717/peerj.6828)
Supplement: Supplemental Information 4 — (A) Nano-drop raw data of protein concentration (µg/mL) for GE resin with pH 7.0. (B) Nano-drop raw data of protein concentration (µg/mL) for amicogen resin with pH 8.5. (C) Nano-drop raw data of protein concentration (µg/mL) for amicogen resin with pH 9.5. (D) Nano-drop raw data of protein concentration (µg/mL) for amicogen resin with pH 10.5. (E) Nano-drop raw data of protein concentration (µg/mL) for amicogen resin with pH 11.5. (F) Raw data for mean values of protein concentration ((µg/mL) obtained from GR, 8.5R (AR), 9.5R (BR), 10.5R (CR), 11.5R (DR). The vertical axis values (µg/mL) represent the mean value of triple measurement per each case. Diamond, positive control resin (GE) (GE Healthcare, Uppsala, Sweden); Square, resins under pH 8.5 condition (8.5R); Triangle, resins under pH 9.5 condition (9.5R); Circle, resins under pH 10.5 condition (10.5R), and Cross, resins under pH 11.5 condition(11.5R), respectively. [file peerj-07-6828-s004.xlsx]

## Sheet: Sheet1
	※ Purification result of Resin pH, respectively (Fraction concentrarion, µg/ml)
										F	Concentration(µg/ml)
A	GE Resin (pH 7.0)	F1	F2	F3	F4	F5	F6	F7			GE	265	299.25	221.5	57	14	4.75	1.375
	1st	238	326	165	47	8	1	0.5			8.5R	57	56	42.5	494	116.25	30.5	20.25
	2nd	270	295	175	45	4	2	1			9.5R	93.75	73.25	126	555.5	248.75	46.5	28
	3rd	280	280	260	60	20	0	0			10.5R	13.25	10.25	81.25	403.5	59.25	22.25	1.625
	4th	272	296	286	76	24	16	4			11.5R	15.25	30.75	18.25	13.5	3.975	3.825	1.35
	Concentration(µg/ml)	265	299.25	221.5	57	14	4.75	1.375
	Standard deviation	18.5113	19.2765	60.5447	14.3062	9.5219	7.54431	1.79699
	Standard error	9.25563	9.63825	30.2724	7.15309	4.76095	3.77216	0.898494
	Error bar	4.62781	4.81912	15.1362	3.57654	2.38048	1.88608	0.449247
B	Amicogen Resin (pH 8.5)	F1	F2	F3	F4	F5	F6	F7		G
	1st	17	25	15	500	75	10	9
	2nd	25	13	17	470	72	14	6
	3rd	78	72	74	474	166	58	36
	4th	108	114	64	532	152	40	30
	Concentration(µg/ml)	57	56	42.5	494	116.25	30.5	20.25
	Standard deviation	43.4588	46.2961	30.8815	28.6124	49.7083	22.6495	14.975
	Standard error	21.7294	23.1481	15.4407	14.3062	24.8542	11.3248	7.48749
	Error bar	10.8647	11.574	7.72037	7.15309	12.4271	5.66238	3.74374
C	Amicogen Resin (pH 9.5)	F1	F2	F3	F4	F5	F6	F7
	1st	15	33	60	600	134	36	7
	2nd	30	22	60	500	149	44	5
	3rd	162	110	176	480	364	52	52
	4th	168	128	208	642	348	54	48
	Concentration(µg/ml)	93.75	73.25	126	555.5	248.75	46.5	28
	Standard deviation	82.5364	53.5249	77.3218	77.9808	124.165	8.22598	25.4689
	Standard error	41.2682	26.7625	38.6609	38.9904	62.0824	4.11299	12.7345
	Error bar	20.6341	13.3812	19.3305	19.4952	31.0412	2.05649	6.36723
D	Amicogen Resin (pH 10.5)	F1	F2	F3	F4	F5	F6	F7
	1st	7	9	60	390	45	35	2
	2nd	12	2	61	430	50	40	0.5
	3rd	20	20	92	422	78	10	2
	4th	14	10	112	372	64	4	2
	Concentration(µg/ml)	13.25	10.25	81.25	403.5	59.25	22.25	1.625
	Standard deviation	5.37742	7.41058	25.3163	27.1968	14.8633	17.8955	0.75
	Standard error	2.68871	3.70529	12.6582	13.5984	7.43163	8.94777	0.375
	Error bar	1.34436	1.85264	6.32908	6.7992	3.71582	4.47388	0.1875
E	Amicogen Resin (pH 11.5)	F1	F2	F3	F4	F5	F6	F7
	1st	7	24	15	20	0.5	0.2	0.2
	2nd	18	25	18	22	0.4	0.1	0.2
	3rd	17	55	28	5	8	8	2
	4th	19	19	12	7	7	7	3
	Concentration(µg/ml)	15.25	30.75	18.25	13.5	3.975	3.825	1.35
	Standard deviation	5.56028	16.3783	6.94622	8.73689	4.09095	4.26331	1.38924
	Standard error	2.78014	8.18917	3.47311	4.36845	2.04547	2.13166	0.694622
	Error bar	1.39007	4.09458	1.73656	2.18422	1.02274	1.06583	0.347311
