# Supplementary material for: Purification of plant-derived anti-virus mAb through optimized pH conditions for coupling between protein A and epoxy-activated beads
Source: PeerJ. 2019 May 21;7:e6828. doi: 10.7717/peerj.6828 (PMC6534112; doi:10.7717/peerj.6828)
Supplement: Supplemental Information 5 — (A) Raw data of virus-neutralizing activity assay. (B) Mean values of RFFIT (IU/mL) of pH 8.5, 9.5, 10.5, and 11.5 conditions. (C) Graph obtained from “B.” The values (IU/mL) represent the mean value of duplicate measurements. Commercial protein A resin (GR) (GE Healthcare, Uppsala, Sweden) was used as a positive control. [file peerj-07-6828-s005.xlsx]

## Sheet: Rabies RFFIT SOP
A	Sample	serum dilution	No.of fields containing infected cells		Cumulative totals		Percentage of cells containing infected cells	difference of logarithms (수식)	log (reciprocal of 50% end-point dilution)	50% end-point dilution	No. of IU/ml in the test serum	Result
					Fields containing infected cells	Fields containing no infected cells
	mAbH	-	1st	2nd			-			62.7121	2	2
		5	0	0	0	20	0	0.349485	1.04846
		25	5	7	6	14	30
		125	12	14	13	7	65	0.399411	1.79735
		625	20	20	20	0	100
	GR	-	1st	2nd			-			224.43	7.15747	7.15747
		5	0	0	0	20	0	0.349485	1.04846									C
		25	0	0	0	20	0							B		RFFIT(IU/ml)
		125	5	7	6	14	30								mAbH	2
		625	15	19	17	3	85	0.254171	2.35108						GR	7.16
	8.5R	-	1st	2nd			-			172.466	5.50025	5.50025			8.5R	5.5
		5	0	0	0	20	0	0.349485	1.04846						9.5R	7.29
		25	0	0	0	20	0								10.5R	8.29
		125	7	8	7.5	12.5	37.5
		625	20	20	20	0	100	0.139794	2.2367
	9.5R	-	1st	2nd			-			228.572	7.28958	7.28958
		5	0	0	0	20	0	0.349485	1.04846
		25	0	0	0	20	0
		125	8	6	7	13	35
		625	16	14	15	5	75	0.262114	2.35902
	10.5R	-	1st	2nd			-			259.791	8.28518	8.28518
		5	0	0	0	20	0	0.349485	1.04846
		25	1	0	0.5	19.5	2.5
		125	6	9	7.5	12.5	37.5
		625	12	14	13	7	65	0.317714	2.41462
